# Supplementary material
Source: PubMed Central journal article supplement (PMC2265141)
Supplement: pnas_0710587105_4.pdf [file pnas_0710587105_4.pdf]

Table 3. Low- and high-resolution bands on the long arm of chromosome 11q are listed together with their component isochores (starts, ends, sizes, GC levels and replication timings)

| HsChr11q |                 |                 |                 |          |                 |                 |          |       |             |      |      |
|----------|-----------------|-----------------|-----------------|----------|-----------------|-----------------|----------|-------|-------------|------|------|
| Band     | 400-band        | 850-band        | Hybridization   | Isochore | Start           | End             | Size, Mb | GC, % | Replication |      |      |
| G        | q12             | q12.1           | L1 <sup>-</sup> | q12.1    | 54.5            | 56.6            | 2.1      | 36.6  | L           |      |      |
|          |                 |                 |                 | q12.2    | H3 <sup>-</sup> | q12.2a          | 56.6     | 56.8  | 0.2         | 43.6 | L    |
|          |                 |                 |                 |          |                 | q12.2b          | 56.8     | 57.3  | 0.5         | 48.2 | E    |
|          | q12.2c          | 57.3            | 57.6            |          |                 | 0.3             | 42.1     | E     |             |      |      |
|          | q12.3           | L1 <sup>-</sup> | q12.3a          | 57.6     | 58.6            | 1               | 38.3     | E/(L) |             |      |      |
|          |                 |                 | q12.3b          | 58.6     | 58.8            | 0.2             | 42.7     | * L   |             |      |      |
|          |                 |                 | q12.3c          | 58.8     | 59.2            | 0.4             | 40.5     | (L)/E |             |      |      |
|          |                 |                 | q12.3d          | 59.2     | 59.4            | 0.2             | 41.6     | E     |             |      |      |
|          |                 |                 | q12.3e          | 59.4     | 60.2            | 0.8             | 38.7     | E     |             |      |      |
|          |                 |                 | R               | q13      | q13.1           | H3 <sup>+</sup> | q13.1a   | 60.2  | 61          | 0.8  | 48.7 |
|          | q13.1b          | 61              |                 |          |                 |                 | 61.5     | 0.5   | 54.2        | E    |      |
|          | q13.1c          | 61.5            |                 |          |                 |                 | 61.7     | 0.2   | 46.4        | E    |      |
|          | q13.1d          | 61.7            |                 |          |                 |                 | 61.9     | 0.2   | 43.3        | E    |      |
|          | q13.1e          | 61.9            |                 |          |                 |                 | 62.6     | 0.7   | 49.0        | E    |      |
|          | q13.1f          | 62.6            |                 |          |                 |                 | 63       | 0.4   | 39.5        | E    |      |
| q13.1g   | 63              | 63.3            |                 |          |                 |                 | 0.3      | 44.7  | E           |      |      |
| q13.1h   | 63.3            | 63.9            |                 |          |                 |                 | 0.6      | 55.0  | E           |      |      |
| q13.1i   | 63.9            | 64.1            |                 |          |                 |                 | 0.2      | 49.0  | E           |      |      |
| q13.1l   | 64.1            | 64.6            |                 |          |                 |                 | 0.5      | 53.9  | E           |      |      |
| q13.1m   | 64.6            | 64.9            |                 |          |                 |                 | 0.3      | 50.0  | E           |      |      |
| q13.1n   | 64.9            | 65.2            |                 |          |                 |                 | 0.3      | 54.2  | E           |      |      |
| q13.2    | L1 <sup>-</sup> | q13.2a          |                 |          | 65.2            | 65.6            | 0.4      | 51.2  | E           |      |      |
|          |                 | q13.2b          |                 |          | 65.6            | 66.8            | 1.2      | 49.0  | E           |      |      |
|          |                 | q13.2c          |                 |          | 66.8            | 67.2            | 0.4      | 54.0  | E           |      |      |
|          |                 | q13.2d          | 67.2            | 67.8     | 0.6             | 47.7            | E        |       |             |      |      |
|          |                 | q13.2e          | 67.8            | 68       | 0.2             | 52.7            | E        |       |             |      |      |
|          |                 | q13.2f          | 68              | 68.2     | 0.2             | 43.9            | E        |       |             |      |      |
| q13.3    | H3 <sup>+</sup> | q13.3a          | 68.2            | 68.5     | 0.3             | 49.3            | E        |       |             |      |      |
|          |                 | q13.3b          | 68.5            | 68.7     | 0.2             | 53.3            | E        |       |             |      |      |
|          |                 | q13.3c          | 68.7            | 68.9     | 0.2             | 50.2            | E        |       |             |      |      |
|          |                 | q13.3d          | 68.9            | 69.1     | 0.2             | 52.2            | E        |       |             |      |      |
|          |                 | q13.3e          | 69.1            | 69.9     | 0.8             | 50.5            | E        |       |             |      |      |
|          |                 | q13.3f          | 69.9            | 70.2     | 0.3             | 52.0            | E        |       |             |      |      |
|          |                 | q13.3g          | 70.2            | 71.1     | 0.9             | 49.6            | E        |       |             |      |      |
| q13.4    | L1 <sup>-</sup> | q13.4a          | 71              | 72       | 1               | 45.6            | E/(L)    |       |             |      |      |
|          |                 | q13.4b          | 72              | 72.6     | 0.6             | 45.8            | * L      |       |             |      |      |
|          |                 | q13.4c          | 72.6            | 72.8     | 0.2             | 53.1            | E        |       |             |      |      |
|          |                 | q13.4d          | 72.8            | 73       | 0.2             | 41.4            | E        |       |             |      |      |
|          |                 | q13.4e          | 73              | 74.5     | 1.5             | 42.5            | E        |       |             |      |      |
|          |                 | q13.4f          | 74.5            | 75.3     | 0.8             | 48.1            | E        |       |             |      |      |
|          |                 | q13.4g          | 75.3            | 75.5     | 0.2             | 37.5            | E        |       |             |      |      |
| q13.5    | H3 <sup>+</sup> | q13.5a          | 75.5            | 76.6     | 1.1             | 47.0            | E        |       |             |      |      |
|          |                 | q13.5b          | 76.6            | 77.4     | 0.8             | 40.8            | E        |       |             |      |      |
|          |                 | q13.5c          | 77.4            | 77.7     | 0.3             | 45.6            | E        |       |             |      |      |
|          |                 | q13.5d          | 77.7            | 78       | 0.3             | 39.8            | E        |       |             |      |      |
|          |                 | q13.5e          | 78              | 79.1     | 1.1             | 43.6            | E        |       |             |      |      |

|          |            |        |                 |        |       |       |                 |        |         |     |     |      |   |
|----------|------------|--------|-----------------|--------|-------|-------|-----------------|--------|---------|-----|-----|------|---|
| <b>G</b> | <b>q14</b> | q14.1  | L1 <sup>+</sup> | q14.1a | 79.1  | 79.8  | 0.7             | 38.4   | L       |     |     |      |   |
|          |            |        |                 | q14.1b | 79.8  | 82    | 2.2             | 36.3   | L       |     |     |      |   |
|          |            |        |                 | q14.1c | 82    | 82.9  | 0.9             | 40.0   | * E     |     |     |      |   |
|          |            |        |                 | q14.1d | 82.9  | 85.5  | 2.6             | 37.5   | * L     |     |     |      |   |
|          |            | q14.2  | H3 <sup>-</sup> | q14.2  | 85.5  | 88    | 2.5             | 39.0   | * E/(L) |     |     |      |   |
|          |            | q14.3  | L1 <sup>+</sup> | q14.3a | 88    | 89.1  | 1.1             | 35.6   | L       |     |     |      |   |
|          |            |        |                 | q14.3b | 89.1  | 89.8  | 0.7             | 37.6   | L       |     |     |      |   |
|          |            |        |                 | q14.3c | 89.8  | 91.2  | 1.4             | 35.4   | L       |     |     |      |   |
|          |            |        |                 | q14.3d | 91.2  | 92.1  | 0.9             | 38.8   | L       |     |     |      |   |
| <b>R</b> | <b>q21</b> | q21    | H3 <sup>-</sup> | q21a   | 92.1  | 92.4  | 0.3             | 41.5   | L       |     |     |      |   |
|          |            |        |                 | q21b   | 92.4  | 92.8  | 0.4             | 38.0   | L       |     |     |      |   |
|          |            |        |                 | q21c   | 92.8  | 93.7  | 0.9             | 41.3   | L       |     |     |      |   |
|          |            |        |                 | q21d   | 93.7  | 94.1  | 0.4             | 40.1   | E       |     |     |      |   |
|          |            |        |                 | q21e   | 94.1  | 95    | 0.9             | 40.5   | E       |     |     |      |   |
|          |            |        |                 | q21f   | 95    | 96.3  | 1.3             | 38.0   | E       |     |     |      |   |
| <b>G</b> | <b>q22</b> | q22.1  | L1 <sup>+</sup> | q22.1  | 96.3  | 99.8  | 3.5             | 35.4   | L       |     |     |      |   |
|          |            |        |                 | q22.2  | 99.8  | 103   | 3.6             | 38.2   | L/(E)/L |     |     |      |   |
|          |            |        |                 | q22.3a | 103.4 | 105   | 2               | 35.8   | L       |     |     |      |   |
|          |            |        |                 | q22.3b | 105.4 | 106   | 0.4             | 38.2   | L       |     |     |      |   |
|          |            |        |                 | q22.3c | 105.8 | 107   | 1.1             | 36.8   | L       |     |     |      |   |
|          |            |        |                 | q22.3d | 106.9 | 108   | 0.7             | 41.0   | (L)/E   |     |     |      |   |
|          |            |        |                 | q22.3e | 107.6 | 108   | 0.2             | 38.7   | E       |     |     |      |   |
|          |            |        |                 | q22.3f | 108.3 | 109   | 1.2             | 40.5   | E       |     |     |      |   |
|          |            |        |                 | q22.3g | 108.5 | 110   | 0.2             | 38.5   | E       |     |     |      |   |
|          |            |        |                 | q22.3h | 109.7 | 110   | 0.8             | 41.6   | E       |     |     |      |   |
| q22.3i   | 109.9      | 111    | 3               | 39.4   | E     |       |                 |        |         |     |     |      |   |
| <b>R</b> | <b>q23</b> | q23.1  | H3 <sup>-</sup> | q23.1  | 110.7 | 114   | 3               | 43.2   | E/(L)   |     |     |      |   |
|          |            |        |                 | q23.2  | 113.7 | 115   | 1.2             | 40.1   | * L     |     |     |      |   |
|          |            |        |                 | q23.3a | 114.9 | 118   | 2.7             | 46.2   | E       |     |     |      |   |
|          |            | q23.3b | H3 <sup>+</sup> | q23.3b | 117.6 | 118   | 0.3             | 42.0   | E       |     |     |      |   |
|          |            |        |                 | q23.3c | 117.9 | 120   | 2.5             | 47.9   | E       |     |     |      |   |
| <b>G</b> | <b>q24</b> | q24.1  | L1 <sup>-</sup> | q24.1a | 120.4 | 121   | 0.7             | 42.0   | E       |     |     |      |   |
|          |            |        |                 | q24.1b | 121.1 | 122   | 0.9             | 39.5   | E       |     |     |      |   |
|          |            |        |                 | q24.1c | 122   | 123   | 0.8             | 43.9   | L       |     |     |      |   |
|          |            |        |                 | q24.1d | 122.8 | 123   | 0.3             | 45.4   | L       |     |     |      |   |
|          |            |        |                 | q24.1e | 123.1 | 124   | 0.5             | 38.0   | E       |     |     |      |   |
|          |            |        |                 | q24.1f | 123.6 | 124   | 0.2             | 36.6   | E       |     |     |      |   |
|          |            |        |                 | q24.1g | 123.8 | 124   | 0.2             | 39.0   | E       |     |     |      |   |
|          |            |        |                 |        |       | q24.2 | H3 <sup>-</sup> | q24.2a | 124     | 125 | 0.5 | 43.5 | E |
|          |            |        |                 |        |       |       |                 | q24.2b | 124.5   | 125 | 0.3 | 48.4 | E |
|          |            |        |                 |        |       |       |                 | q24.2c | 124.8   | 126 | 0.7 | 42.1 | E |
|          |            |        |                 |        |       |       |                 | q24.2d | 125.5   | 126 | 0.2 | 46.9 | E |
|          |            |        |                 |        |       |       |                 | q24.2e | 125.7   | 126 | 0.2 | 51.9 | E |
|          |            |        |                 |        |       |       |                 | q24.2f | 125.9   | 126 | 0.3 | 46.6 | E |
|          |            | q24.2g | 126.2           | 127    | 0.4   | 42.6  | E               |        |         |     |     |      |   |
|          |            | q24.3  | L1 <sup>-</sup> | q24.3  | 126.6 | 128   | 1.3             | 38.9   | * L     |     |     |      |   |
| <b>R</b> | <b>q25</b> | q25    | H3 <sup>-</sup> | q25a   | 127.9 | 128   | 0.2             | 43.3   | E       |     |     |      |   |
|          |            |        |                 | q25b   | 128.1 | 128   | 0.2             | 47.0   | E       |     |     |      |   |

|             |       |     |     |      |   |
|-------------|-------|-----|-----|------|---|
| <b>q25c</b> | 128.3 | 130 | 1.7 | 42.6 | L |
| <b>q25d</b> | 130   | 132 | 1.9 | 42.7 | L |
| <b>q25e</b> | 131.9 | 132 | 0.4 | 40.6 |   |
| <b>q25f</b> | 132.3 | 133 | 0.9 | 42.8 |   |
| <b>q25g</b> | 133.2 | 134 | 0.6 | 47.6 |   |
| <b>q25h</b> | 133.8 | 135 | 0.7 | 46.4 |   |

---

Isochore nomenclature is according to Costantini et al. (14).

L, late-replicating; E, early-replicating; L/(E) or E/(L), isochores with a small terminal region (in brackets) showing a different timing. As in SI Fig. 4, horizontal red lines separate low-resolution bands; black horizontal lines separate high-resolution bands.

Vertical red or blue thick lines indicate regions having early- or late- replication timing.

Red or blue asterisks indicate individual isochores having early- or late- replication timings.
