# Supplementary material
Source: PubMed Central journal article supplement (PMC2265141)
Supplement: pnas_0710587105_5.pdf [file pnas_0710587105_5.pdf]

Table 4. Low- and high-resolution bands on the long arm of chromosome 6 are listed together with their component isochores (starts, ends, sizes, GC level and replication timings)

| HsChr6   |              |                 |                       |            |           |             |            |             |              |
|----------|--------------|-----------------|-----------------------|------------|-----------|-------------|------------|-------------|--------------|
| Band     | 400-band     | 850-band        | Hybridization         | Isochore   | Start     | End         | Size, Mb   | GC, %       | Replication  |
| <b>R</b> | <b>p25</b>   | p25.3           | H3 <sup>-</sup>       | p25.3      | 0         | 1.7         | 1.7        | 44.0        | E/(L)        |
|          |              | p25.2           | L1 <sup>-</sup>       | p25.2      | 1.7       | 2.1         | 0.4        | 39.3        | E            |
|          |              | p25.1           | H3 <sup>-</sup>       | p25.1a     | 2.1       | 3.1         | 1.0        | 43.4        | * L/(E)      |
|          |              |                 |                       | p25.1b     | 3.1       | 3.9         | 0.8        | 46.0        | E            |
|          |              |                 |                       | p25.1c     | 3.9       | 4.1         | 0.2        | 40.3        | E            |
|          |              |                 |                       | p25.1d     | 4.1       | 5.2         | 1.1        | 43.0        | E            |
|          |              |                 |                       | p25.1e     | 5.2       | 5.5         | 0.3        | 40.2        | E            |
| p25.1f   | 5.5          | 8.1             | 2.6                   | 43.2       | E         |             |            |             |              |
| <b>G</b> | <b>p24</b>   | p24.3           | L1 <sup>-</sup>       | p24.3      | 8.1       | 10.2        | 2.1        | 37.7        | E/(L)        |
|          |              | p24.2           | H3 <sup>-</sup>       | p24.2      | 10.2      | 11.5        | 1.3        | 42.4        | E            |
|          |              | p24.1           | L1 <sup>-</sup>       | p24.1      | 11.5      | 13          | 1.5        | 40.0        | E            |
| <b>R</b> | <b>p23</b>   | <b>p23</b>      | <b>H3<sup>-</sup></b> | <b>p23</b> | <b>13</b> | <b>18.5</b> | <b>5.5</b> | <b>42.4</b> | <b>E/(L)</b> |
| <b>G</b> | <b>p22</b>   | p22.3           | L1 <sup>-</sup>       | p22.3a     | 18.5      | 19.9        | 1.4        | 38.2        | L            |
|          |              |                 |                       | p22.3b     | 19.9      | 20.1        | 0.2        | 40.0        | L            |
|          |              |                 |                       | p22.3c     | 20.1      | 20.6        | 0.5        | 42.3        | E            |
|          |              |                 |                       | p22.3d     | 20.6      | 21.3        | 0.7        | 38.0        | E            |
|          |              |                 |                       | p22.3e     | 21.3      | 22.1        | 0.8        | 42.4        | E            |
|          |              |                 |                       | p22.3f     | 22.1      | 24.5        | 2.4        | 37.7        | E            |
|          |              | p22.2           | H3 <sup>-</sup>       | p22.2a     | 24.5      | 24.7        | 0.2        | 42.7        | E            |
|          |              |                 |                       | p22.2b     | 24.7      | 24.9        | 0.2        | 40.9        | E            |
|          |              |                 |                       | p22.2c     | 24.9      | 25.2        | 0.3        | 41.6        | E            |
|          |              |                 |                       | p22.2d     | 25.2      | 26.1        | 0.9        | 39.4        | E            |
|          |              |                 |                       | p22.2e     | 26.1      | 26.7        | 0.6        | 42.8        | * L          |
|          |              | p22.1           | L1 <sup>-</sup>       | p22.1a     | 26.7      | 27.2        | 0.5        | 39.0        | * E          |
|          |              |                 |                       | p22.1b     | 27.2      | 27.4        | 0.2        | 42.4        | * L          |
|          |              |                 |                       | p22.1c     | 27.4      | 27.6        | 0.2        | 40.4        | E            |
|          |              |                 |                       | p22.1d     | 27.6      | 28          | 0.4        | 42.4        | E            |
|          |              |                 |                       | p22.1e     | 28        | 28.7        | 0.7        | 39.9        | E            |
|          |              |                 |                       | p22.1f     | 28.7      | 29.1        | 0.4        | 42.6        | E            |
| p22.1g   | 29.1         | 29.5            | 0.4                   | 36.9       | E         |             |            |             |              |
| <b>R</b> | <b>p21.3</b> | p21.33          | H3 <sup>+</sup>       | p21.33a    | 29.5      | 30.6        | 1.1        | 44.2        | E            |
|          |              |                 |                       | p21.33b    | 30.6      | 31.3        | 0.7        | 48.2        | E            |
|          |              |                 |                       | p21.33c    | 31.3      | 31.6        | 0.3        | 44.2        | E            |
|          |              |                 |                       | p21.33d    | 31.6      | 32.3        | 0.7        | 51.9        | E            |
|          | p21.32       | 32.3            | 33.2                  | 0.9        | 41.1      | E           |            |             |              |
|          | p21.31       | H3 <sup>+</sup> | p21.31a               | 33.2       | 33.7      | 0.5         | 49.6       | E           |              |
|          |              |                 | p21.31b               | 33.7       | 34        | 0.3         | 52.8       | E           |              |
|          |              |                 | p21.31c               | 34         | 34.3      | 0.3         | 52.3       | E           |              |
|          |              |                 | p21.31d               | 34.3       | 34.7      | 0.4         | 47.9       | E           |              |
|          |              |                 | p21.31e               | 34.7       | 35.1      | 0.4         | 42.8       | E           |              |
|          |              |                 | p21.31f               | 35.1       | 35.6      | 0.5         | 48.6       | E           |              |
|          |              |                 | p21.31g               | 35.6       | 36.2      | 0.6         | 43.1       | E           |              |
|          |              |                 | p21.31h               | 36.2       | 36.7      | 0.5         | 45.0       | E           |              |
| p21.31i  |              |                 | 36.7                  | 37.3       | 0.6       | 48.5        | E          |             |              |

|          |              |              |                       |                  |      |      |     |      |       |
|----------|--------------|--------------|-----------------------|------------------|------|------|-----|------|-------|
|          |              |              |                       | <b>p21.31l</b>   | 37.3 | 37.5 | 0.2 | 43.0 | E     |
|          |              |              |                       | <b>p21.31m</b>   | 37.5 | 37.9 | 0.4 | 49.5 | * L   |
| <b>G</b> | <b>p21.2</b> | <b>p21.2</b> | <b>L1<sup>-</sup></b> | <b>p21.2</b>     | 37.9 | 39.1 | 1.2 | 40.0 | E     |
| <b>R</b> | <b>p21.1</b> | <b>p21.1</b> | <b>H3<sup>+</sup></b> | <b>p21.1a</b>    | 39.1 | 39.5 | 0.4 | 47.5 | E/(L) |
|          |              |              |                       | <b>p21.1b</b>    | 39.5 | 39.8 | 0.3 | 39.0 | L     |
|          |              |              |                       | <b>p21.1c</b>    | 39.8 | 40.4 | 0.6 | 44.0 | L     |
|          |              |              |                       | <b>p21.1d</b>    | 40.4 | 40.9 | 0.5 | 47.0 | E     |
|          |              |              |                       | <b>p21.1e</b>    | 40.9 | 41.4 | 0.5 | 43.7 | E     |
|          |              |              |                       | <b>p21.1f</b>    | 41.4 | 42.3 | 0.9 | 48.7 | E     |
|          |              |              |                       | <b>p21.1g</b>    | 42.3 | 43   | 0.7 | 43.9 | E     |
|          |              |              |                       | <b>p21.1h</b>    | 43   | 44.4 | 1.4 | 49.7 | E     |
|          |              |              |                       | <b>p21.1i</b>    | 44.4 | 44.9 | 0.5 | 43.9 | E     |
| <b>G</b> | <b>p12</b>   | <b>p12.3</b> | <b>L1<sup>+</sup></b> | <b>p12.3a</b>    | 44.9 | 45.4 | 0.5 | 36.4 | * L   |
|          |              |              |                       | <b>p12.3b</b>    | 45.4 | 45.6 | 0.2 | 38.4 | E     |
|          |              |              |                       | <b>p12.3c</b>    | 45.6 | 46.1 | 0.5 | 42.5 | E     |
|          |              |              |                       | <b>p12.3d</b>    | 46.1 | 48   | 1.9 | 39.2 | E/(L) |
|          |              |              |                       | <b>p12.3e</b>    | 48   | 50.7 | 2.7 | 35.9 | L     |
|          |              |              |                       | <b>p12.3f</b>    | 50.7 | 52.2 | 1.5 | 38.2 | L     |
|          |              | <b>p12.2</b> | <b>H3<sup>+</sup></b> | <b>p12.2a</b>    | 52.2 | 53.4 | 1.2 | 42.2 | E     |
|          |              |              |                       | <b>p12.2b</b>    | 53.4 | 54   | 0.6 | 39.6 | E     |
|          |              | <b>p12.1</b> | <b>L1<sup>+</sup></b> | <b>p12.1</b>     | 54   | 56.6 | 2.6 | 36.0 | L     |
| <b>R</b> | <b>p11.2</b> | <b>p11.2</b> | <b>H3<sup>+</sup></b> | <b>p11.2-p11</b> | 56.6 | 58.9 | 2.3 | 38.0 | L/(E) |
| <b>R</b> | <b>q11.2</b> | <b>q11.2</b> | <b>H3<sup>+</sup></b> | <b>q11.2</b>     | 63.8 | 64.8 | 1.0 | 38.2 | * E   |
| <b>G</b> | <b>q12</b>   | <b>q12</b>   | <b>L1<sup>+</sup></b> | <b>q12</b>       | 64.8 | 70.2 | 5.4 | 34.7 | * L   |
| <b>R</b> | <b>q13</b>   | <b>q13</b>   | <b>H3<sup>+</sup></b> | <b>q13a</b>      | 70.2 | 72.4 | 2.2 | 37.6 | * E   |
|          |              |              |                       | <b>q13b</b>      | 72.4 | 73.1 | 0.7 | 36.0 | * L   |
|          |              |              |                       | <b>q13c</b>      | 73.1 | 73.4 | 0.3 | 37.3 | E     |
|          |              |              |                       | <b>q13d</b>      | 73.4 | 73.9 | 0.5 | 36.9 | E     |
|          |              |              |                       | <b>q13e</b>      | 73.9 | 74.5 | 0.6 | 43.0 | E     |
| <b>G</b> | <b>q14</b>   | <b>q14.1</b> | <b>L1<sup>-</sup></b> | <b>q14.1a</b>    | 74.5 | 74.9 | 0.4 | 38.6 | E     |
|          |              |              |                       | <b>q14.1b</b>    | 74.9 | 75.9 | 1.0 | 36.4 | * L   |
|          |              |              |                       | <b>q14.1c</b>    | 75.9 | 77   | 1.1 | 38.1 | * E   |
|          |              |              |                       | <b>q14.1d</b>    | 77   | 79.4 | 2.4 | 36.3 | * L   |
|          |              |              |                       | <b>q14.1e</b>    | 79.4 | 79.7 | 0.3 | 38.2 | E     |
|          |              |              |                       | <b>q14.1f</b>    | 79.7 | 79.9 | 0.2 | 34.5 | E     |
|          |              |              |                       | <b>q14.1g</b>    | 79.9 | 80.9 | 1.0 | 38.1 | L     |
|          |              |              |                       | <b>q14.1h</b>    | 80.9 | 81.1 | 0.2 | 36.6 | L     |
|          |              |              |                       | <b>q14.1i</b>    | 81.1 | 81.3 | 0.2 | 37.6 | L     |
|          |              |              |                       | <b>q14.1l</b>    | 81.3 | 82.5 | 1.2 | 35.6 | L     |
|          |              | <b>q14.2</b> | <b>H3<sup>+</sup></b> | <b>q14.2</b>     | 82.5 | 84   | 1.5 | 38.0 | L     |
|          |              | <b>q14.3</b> | <b>L1<sup>-</sup></b> | <b>q14.3</b>     | 84   | 88   | 4.0 | 38.5 | L/(E) |
| <b>R</b> | <b>q15</b>   | <b>q15</b>   | <b>H3<sup>+</sup></b> | <b>q15a</b>      | 88   | 89.4 | 1.4 | 39.7 | E     |
|          |              |              |                       | <b>q15b</b>      | 89.4 | 89.7 | 0.3 | 36.1 | E     |
|          |              |              |                       | <b>q15c</b>      | 89.7 | 90.8 | 1.1 | 42.5 | E     |
|          |              |              |                       | <b>q15d</b>      | 90.8 | 92.1 | 1.3 | 38.7 | L     |

|        |        |                 |                 |                 |                 |         |       |         |         |      |   |
|--------|--------|-----------------|-----------------|-----------------|-----------------|---------|-------|---------|---------|------|---|
| G      | q16    | q16.1           | L1 <sup>+</sup> | q16.1a          | 92.1            | 97.2    | 5.1   | 35.1    | L       |      |   |
|        |        |                 |                 | q16.1b          | 97.2            | 97.9    | 0.7   | 38.0    | * E/(L) |      |   |
|        |        |                 |                 | q16.1c          | 97.9            | 99.1    | 1.2   | 35.5    | * L     |      |   |
|        |        | q16.2           | H3 <sup>-</sup> | q16.2           | 99.1            | 101     | 1.9   | 38.4    | * E/(L) |      |   |
|        |        | q16.3           | L1 <sup>+</sup> | q16.3a          | 101.1           | 101.4   | 0.3   | 33.8    | L       |      |   |
|        |        |                 |                 | q16.3b          | 101.4           | 102     | 0.6   | 36.9    | L       |      |   |
|        |        |                 |                 | q16.3c          | 102             | 104.9   | 2.9   | 34.6    | L       |      |   |
|        | R      | q21             | q21             | H3 <sup>-</sup> | q21a            | 104.9   | 106.7 | 1.8     | 39.4    | E    |   |
|        |        |                 |                 |                 | q21b            | 106.7   | 107.2 | 0.5     | 39.6    | E    |   |
| q21c   |        |                 |                 |                 | 107.2           | 107.6   | 0.4   | 44.1    | E       |      |   |
| q21d   |        |                 |                 |                 | 107.6           | 108     | 0.4   | 39.8    | E       |      |   |
| q21e   |        |                 |                 |                 | 108             | 108.7   | 0.7   | 43.0    | E       |      |   |
| q21f   |        |                 |                 |                 | 108.7           | 108.9   | 0.2   | 39.4    | E       |      |   |
| q21g   |        |                 |                 |                 | 108.9           | 109.4   | 0.5   | 42.5    | E       |      |   |
| q21h   |        |                 |                 |                 | 109.4           | 109.7   | 0.3   | 38.5    | E       |      |   |
| q21i   |        |                 |                 |                 | 109.7           | 109.9   | 0.2   | 44.0    | E       |      |   |
| q21l   |        |                 |                 |                 | 109.9           | 110.2   | 0.3   | 38.8    | E       |      |   |
| q21m   |        |                 |                 |                 | 110.2           | 110.5   | 0.3   | 42.6    | E       |      |   |
| q21n   |        |                 |                 |                 | 110.5           | 110.8   | 0.3   | 38.6    | * L     |      |   |
| q21o   |        |                 |                 |                 | 110.8           | 111     | 0.2   | 42.7    | E       |      |   |
| q21p   |        |                 |                 |                 | 111             | 111.2   | 0.2   | 39.7    | E       |      |   |
| q21q   |        |                 |                 |                 | 111.2           | 111.5   | 0.3   | 42.9    | E       |      |   |
| q21r   |        |                 |                 |                 | 111.5           | 112     | 0.5   | 39.4    | E       |      |   |
| q21s   |        |                 |                 |                 | 112             | 112.5   | 0.5   | 42.4    | E       |      |   |
| q21t   | 112.5  | 112.8           | 0.3             | 39.2            | E               |         |       |         |         |      |   |
| G      | q22    | q22.1           | L1 <sup>-</sup> | q22.1a          | 112.8           | 113.6   | 0.8   | 36.0    | E       |      |   |
|        |        |                 |                 | q22.1b          | 113.6           | 115     | 1.4   | 38.0    | E/(L)   |      |   |
|        |        |                 |                 | q22.1c          | 115             | 116.1   | 1.1   | 35.7    | * L     |      |   |
|        |        |                 |                 | q22.1d          | 116.1           | 117.1   | 1.0   | 37.6    | * E     |      |   |
|        |        |                 |                 | q22.1e          | 117.1           | 117.5   | 0.4   | 36.6    | * L     |      |   |
|        |        |                 |                 | q22.1f          | 117.5           | 118.5   | 1.0   | 38.4    | E       |      |   |
|        |        |                 |                 | q22.2           | H3 <sup>-</sup> | q22.2   | 118.5 | 119.9   | 1.4     | 38.9 | E |
|        |        |                 |                 | q22.31          | L1 <sup>+</sup> | q22.31a | 119.9 | 121.7   | 1.8     | 35.5 | L |
|        |        |                 |                 |                 |                 | q22.31b | 121.7 | 122.2   | 0.5     | 38.0 | L |
|        |        |                 |                 |                 |                 | q22.31c | 122.2 | 122.9   | 0.7     | 36.2 | L |
|        |        |                 |                 |                 |                 | q22.31d | 122.9 | 123.4   | 0.5     | 37.8 | L |
|        |        |                 |                 |                 |                 | q22.31e | 123.4 | 125.1   | 1.7     | 35.8 | L |
|        | q22.32 | H3 <sup>-</sup> | q22.32          | 125.1           | 126.6           | 1.5     | 38.6  | * E/(L) |         |      |   |
|        | q22.33 | L1 <sup>+</sup> | q22.33a         | 126.6           | 127.7           | 1.1     | 36.2  | L       |         |      |   |
|        |        |                 | q22.33b         | 127.7           | 127.9           | 0.2     | 38.7  | L       |         |      |   |
|        |        |                 | q22.33c         | 127.9           | 129.9           | 2.0     | 35.9  | L       |         |      |   |
| R      | q23    | q23.1           | H3 <sup>-</sup> | q23.1           | 129.9           | 131.9   | 2.0   | 38.7    | E       |      |   |
|        |        |                 |                 | q23.2           | 131.9           | 134.4   | 2.5   | 37.9    | E/(L)   |      |   |
|        |        |                 |                 | q23.3a          | 134.4           | 134.8   | 0.4   | 41.7    | E       |      |   |
|        |        |                 |                 | q23.3b          | 134.8           | 135.1   | 0.3   | 39.6    | E       |      |   |
|        |        |                 |                 | q23.3c          | 135.1           | 135.3   | 0.2   | 42.2    | E       |      |   |
|        |        |                 |                 | q23.3d          | 135.3           | 135.7   | 0.4   | 39.0    | E       |      |   |
|        |        |                 |                 | q23.3e          | 135.7           | 136.3   | 0.6   | 36.9    | E       |      |   |
| q23.3f | 136.3  | 140.3           | 4.0             | 40.1            | E               |         |       |         |         |      |   |
| G      | q24    | q24.1           | L1 <sup>-</sup> | q24.1a          | 140.3           | 142.3   | 2.0   | 35.3    | L       |      |   |

|          |              |                       |                       |               |       |       |     |      |         |
|----------|--------------|-----------------------|-----------------------|---------------|-------|-------|-----|------|---------|
|          |              |                       |                       | <b>q24.1b</b> | 142.3 | 143   | 0.7 | 37.2 | L       |
|          | <b>q24.2</b> | <b>H3<sup>-</sup></b> |                       | <b>q24.2a</b> | 143   | 144.5 | 1.5 | 39.6 | E       |
|          |              |                       |                       | <b>q24.2b</b> | 144.5 | 144.7 | 0.2 | 41.2 | E       |
|          | <b>q24.3</b> | <b>L1<sup>-</sup></b> |                       | <b>q24.3</b>  | 144.7 | 148.5 | 3.8 | 37.7 | E/(L)   |
| <b>R</b> | <b>q25</b>   | <b>q25.1</b>          | <b>H3<sup>-</sup></b> | <b>q25.1a</b> | 148.5 | 149   | 0.5 | 42.5 | E       |
|          |              |                       |                       | <b>q25.1b</b> | 149   | 149.2 | 0.2 | 40.4 | E       |
|          |              |                       |                       | <b>q25.1c</b> | 149.2 | 149.5 | 0.3 | 41.5 | E       |
|          |              |                       |                       | <b>q25.1d</b> | 149.5 | 149.8 | 0.3 | 39.9 | E       |
|          |              |                       |                       | <b>q25.1e</b> | 149.8 | 151.9 | 2.1 | 43.7 | E       |
|          | <b>q25.2</b> | <b>L1<sup>-</sup></b> |                       | <b>q25.2a</b> | 151.9 | 154.7 | 2.8 | 38.1 | * L     |
|          |              |                       |                       | <b>q25.2b</b> | 154.7 | 155.1 | 0.4 | 41.8 | E       |
|          |              |                       |                       | <b>q25.2c</b> | 155.1 | 155.3 | 0.2 | 39.3 | E       |
|          |              |                       |                       | <b>q25.2d</b> | 155.3 | 155.7 | 0.4 | 43.9 | E       |
|          |              |                       |                       | <b>q25.2e</b> | 155.7 | 156.3 | 0.6 | 37.7 | E       |
|          | <b>q25.3</b> | <b>H3<sup>-</sup></b> |                       | <b>q25.3a</b> | 156.3 | 156.9 | 0.6 | 39.4 | E       |
|          |              |                       |                       | <b>q25.3b</b> | 156.9 | 157.3 | 0.4 | 42.0 | E       |
|          |              |                       |                       | <b>q25.3c</b> | 157.3 | 157.5 | 0.2 | 39.4 | E       |
|          |              |                       |                       | <b>q25.3d</b> | 157.5 | 161.9 | 4.4 | 43.4 | L       |
|          |              |                       |                       | <b>q25.3e</b> | 161.9 | 162.3 | 0.4 | 41.3 | L       |
|          |              |                       |                       | <b>q25.3f</b> | 162.3 | 163.5 | 1.2 | 38.9 | L       |
|          |              |                       |                       | <b>q25.3g</b> | 163.5 | 163.8 | 0.3 | 43.7 | L       |
|          |              |                       |                       | <b>q25.3h</b> | 163.8 | 164   | 0.2 | 37.6 | L       |
|          |              |                       |                       | <b>q25.3i</b> | 164   | 164.6 | 0.6 | 42.5 | L       |
| <b>G</b> | <b>q26</b>   | <b>q26</b>            | <b>L1<sup>-</sup></b> | <b>q26</b>    | 164.6 | 166   | 1.4 | 38.1 | L       |
| <b>R</b> | <b>q27</b>   | <b>q27</b>            | <b>H3<sup>+</sup></b> | <b>q27a</b>   | 166   | 168.2 | 2.2 | 44.9 | * E/(L) |
|          |              |                       |                       | <b>q27b</b>   | 168.2 | 168.9 | 0.7 | 48.9 | L       |
|          |              |                       |                       | <b>q27c</b>   | 168.9 | 170   | 1.1 | 43.6 | L       |
|          |              |                       |                       | <b>q27d</b>   | 170   | 171   | 1   | 47.4 | * E/(L) |

Isochore nomenclature is according to Costantini et al. (14).

L, late-replicating; E, early-replicating; L/(E) or E/(L), isochores with a small terminal region (in brackets) showing a different timing. As in SI Fig. 5, horizontal red lines separate low-resolution bands; black horizontal lines separate high-resolution bands.

Vertical red or blue thick lines indicate regions having early- or late- replication timing.

Red or blue asterisks indicate individual isochores having early- or late- replication timings.
