# Supplementary material
Source: PubMed Central journal article supplement (PMC2265141)

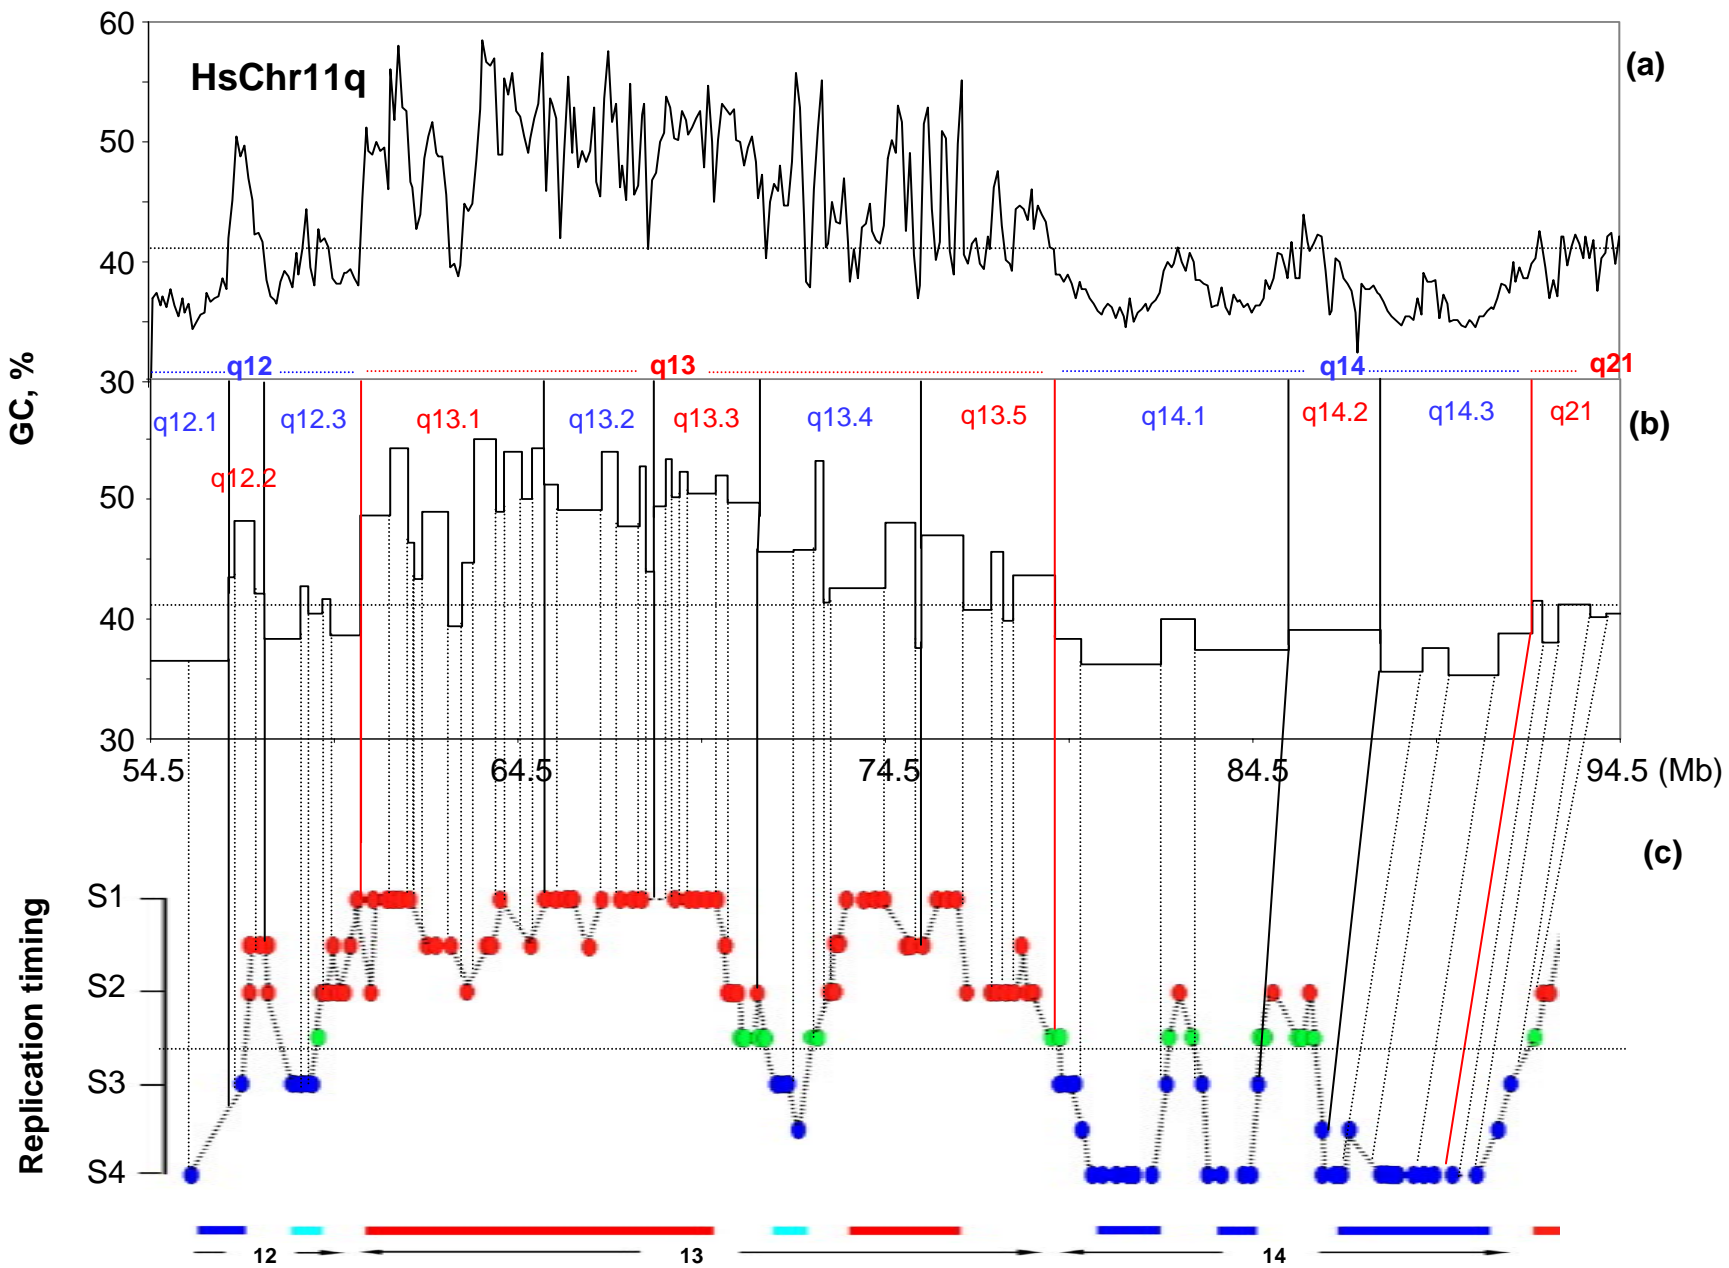

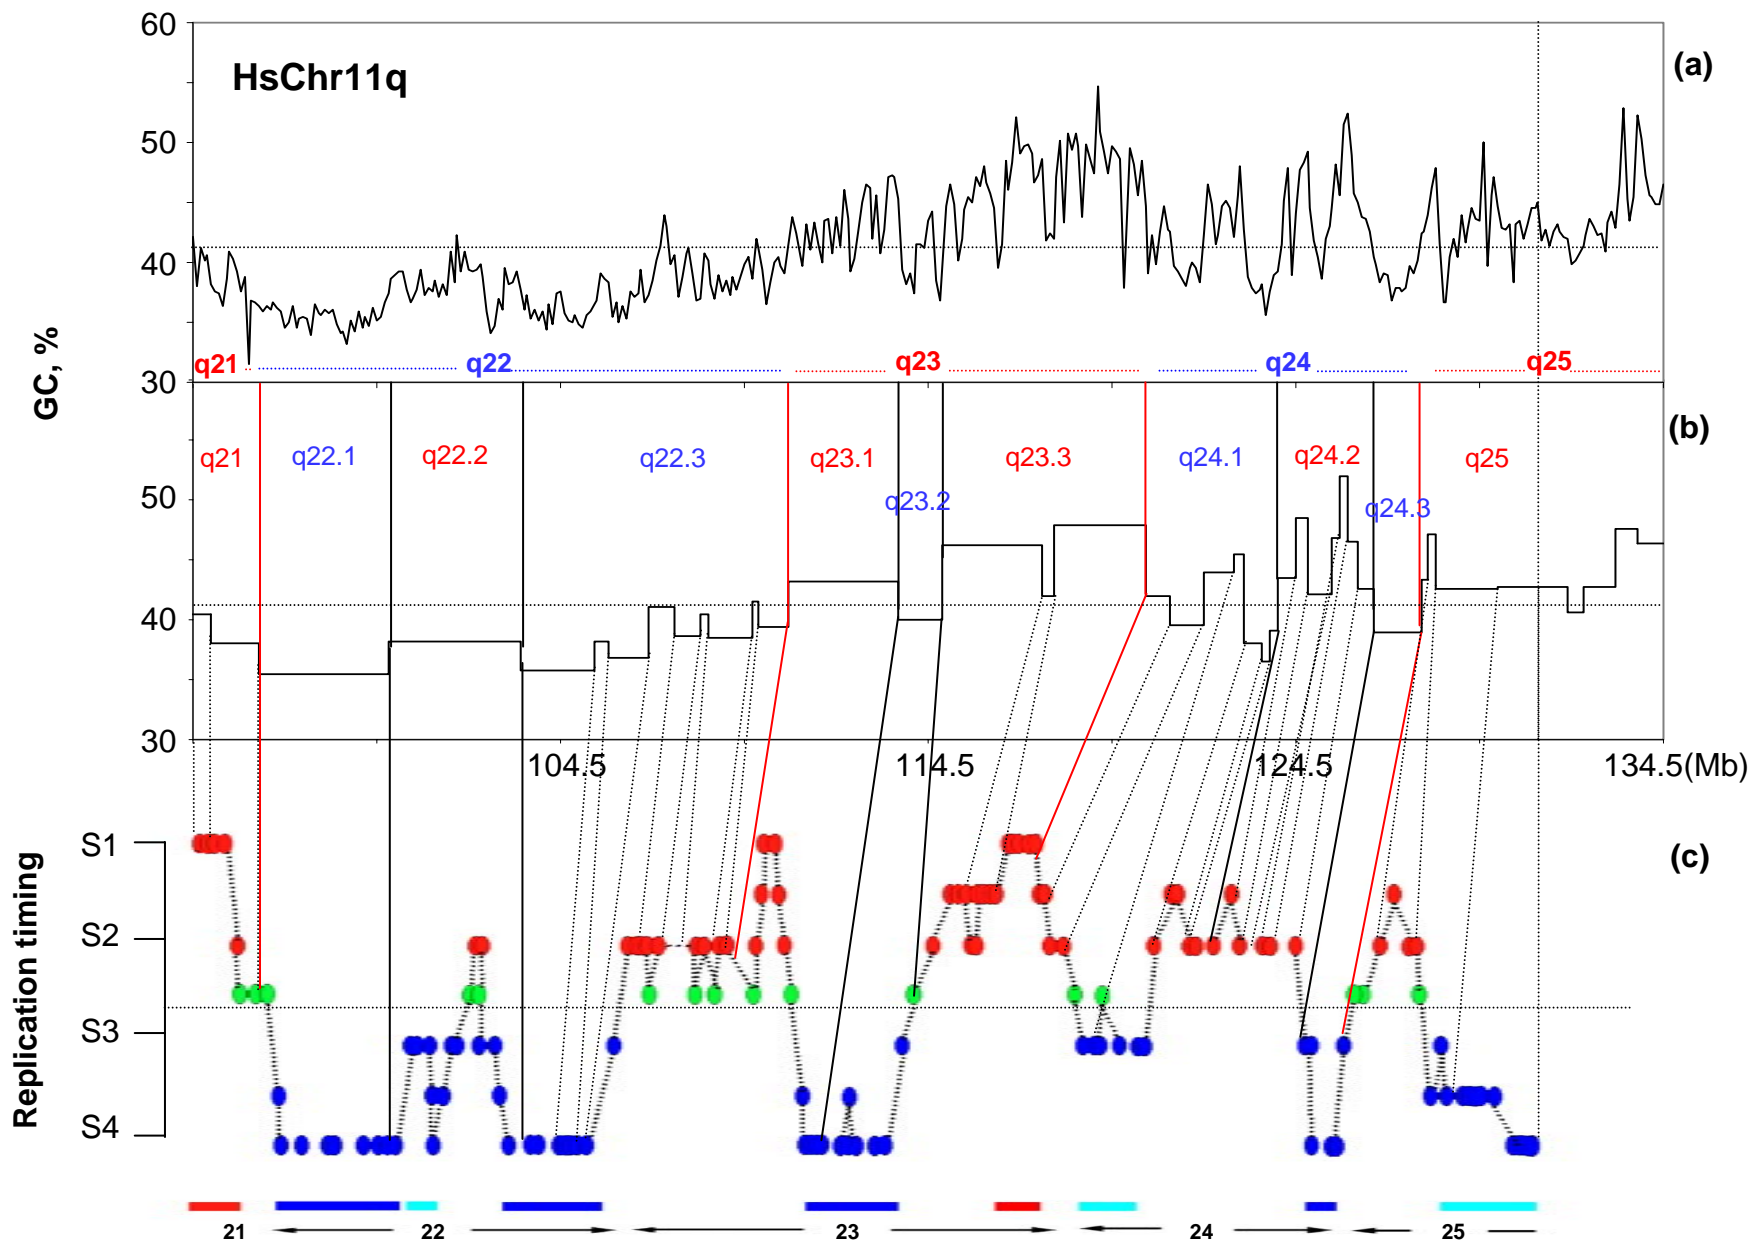

Supplement: pnas_0710587105_1.pdf [file pnas_0710587105_1.pdf]

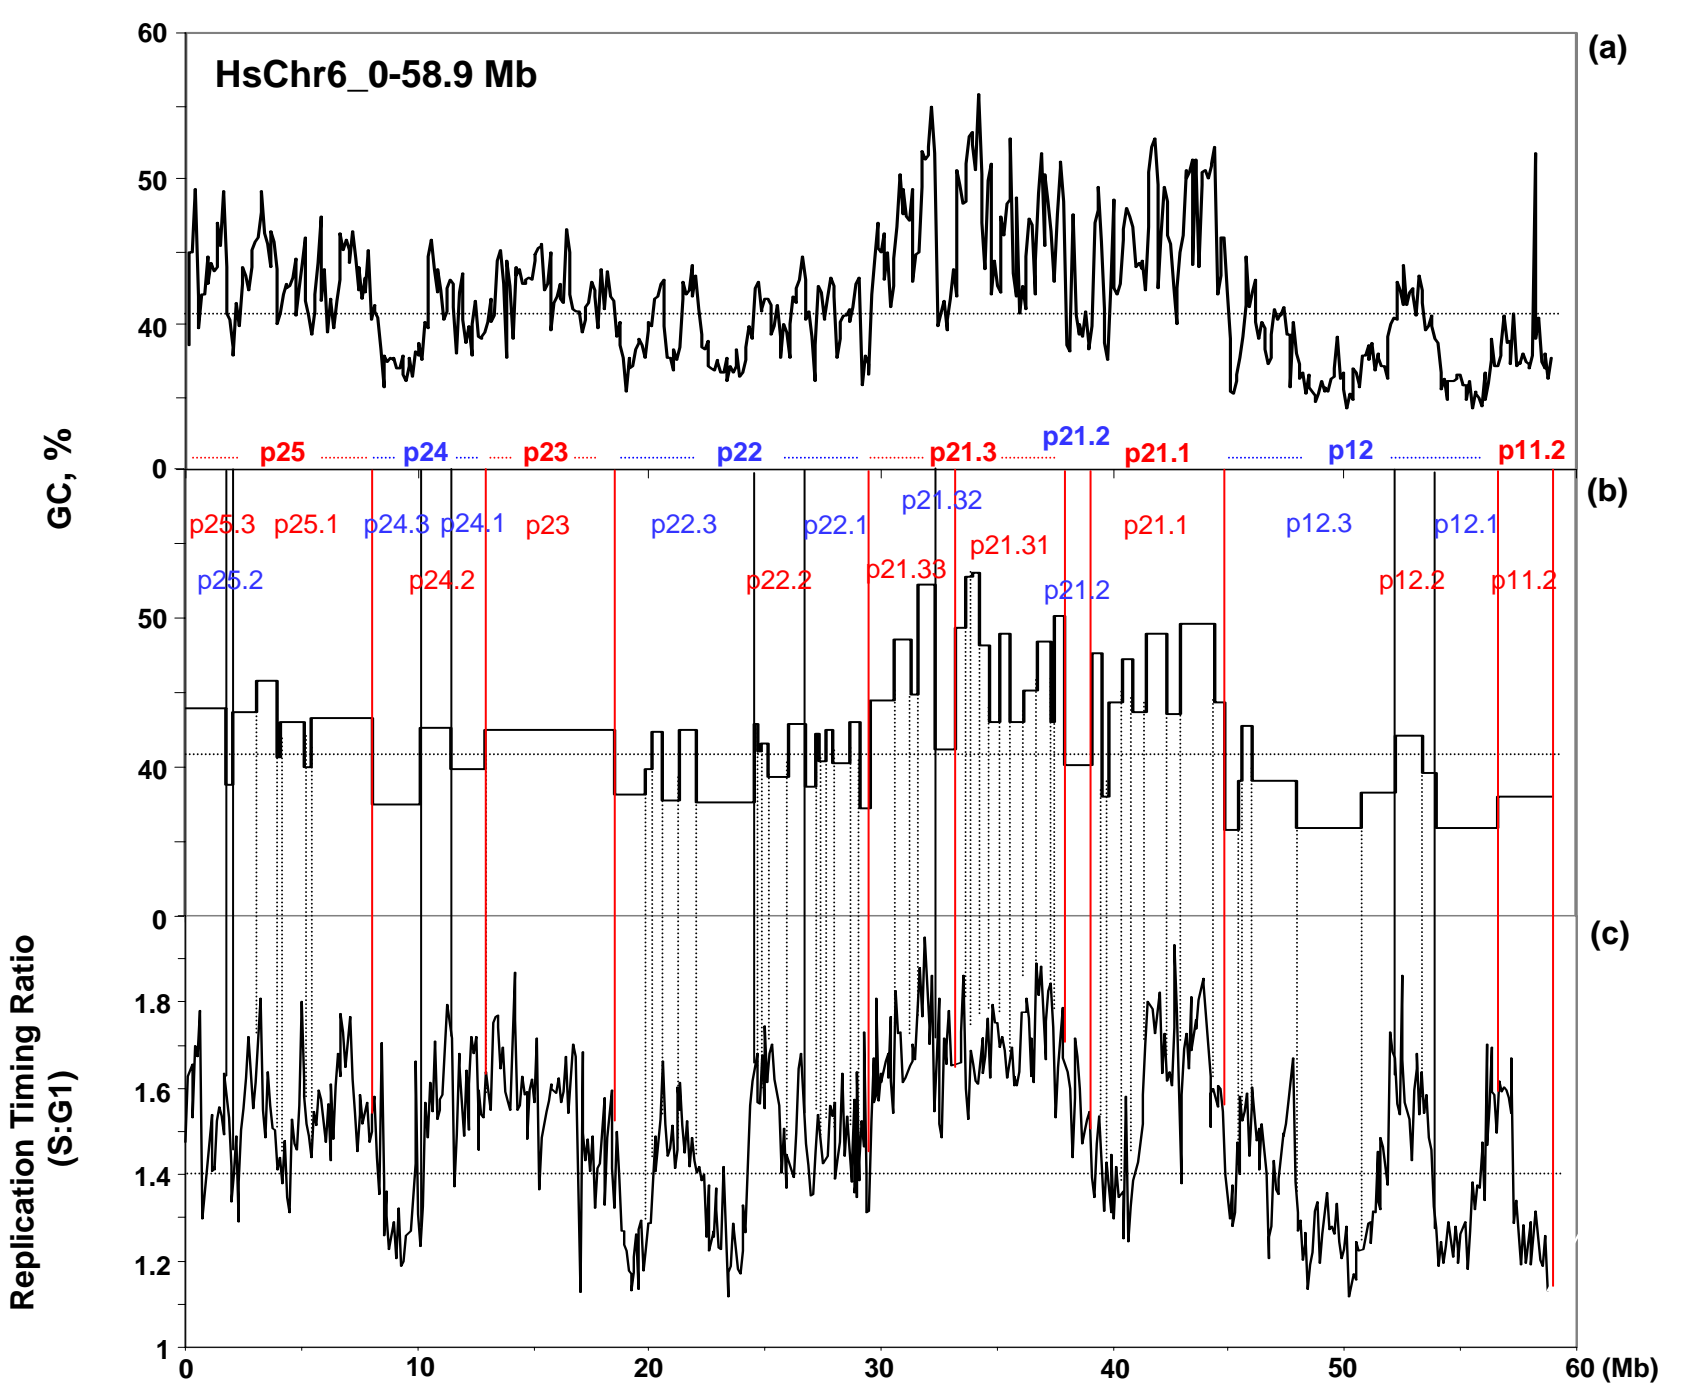

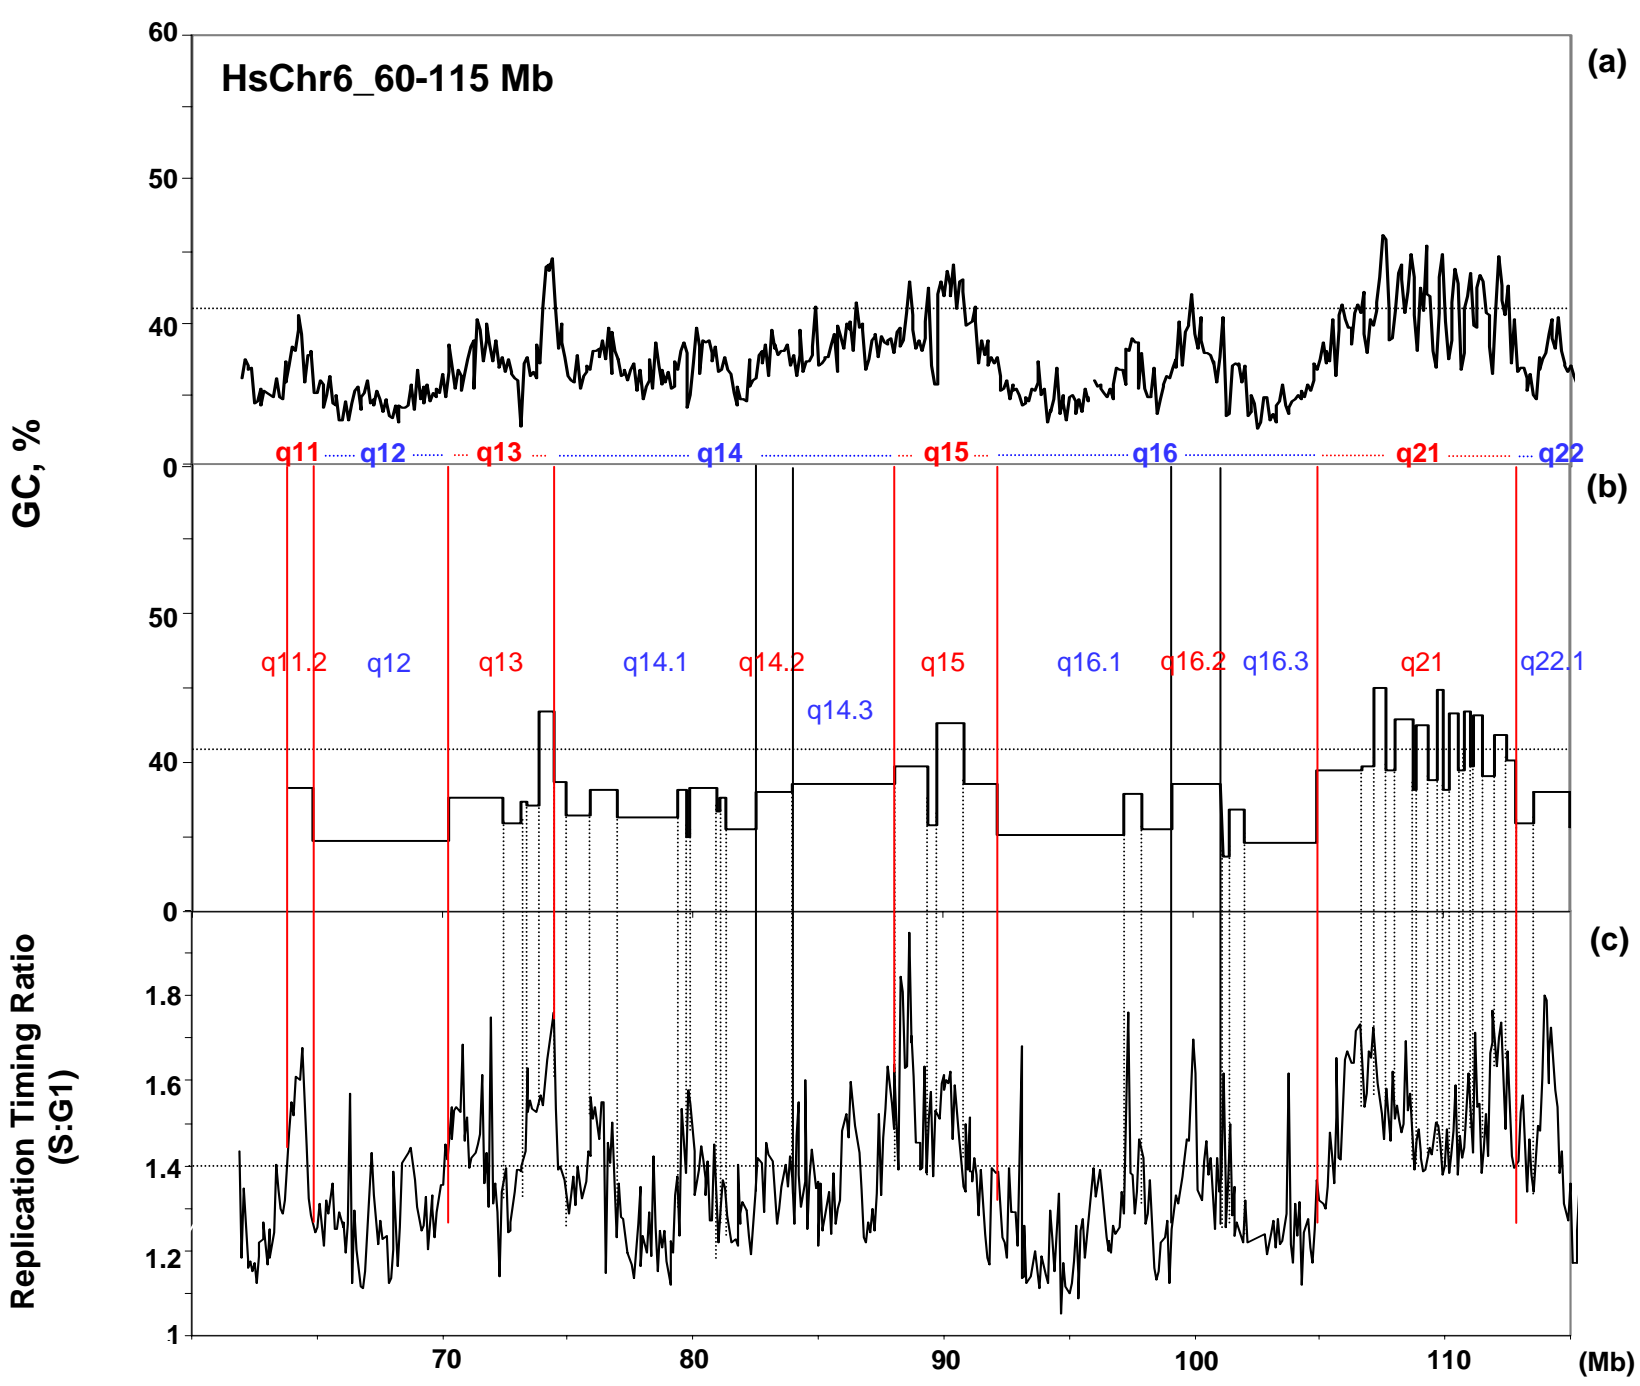

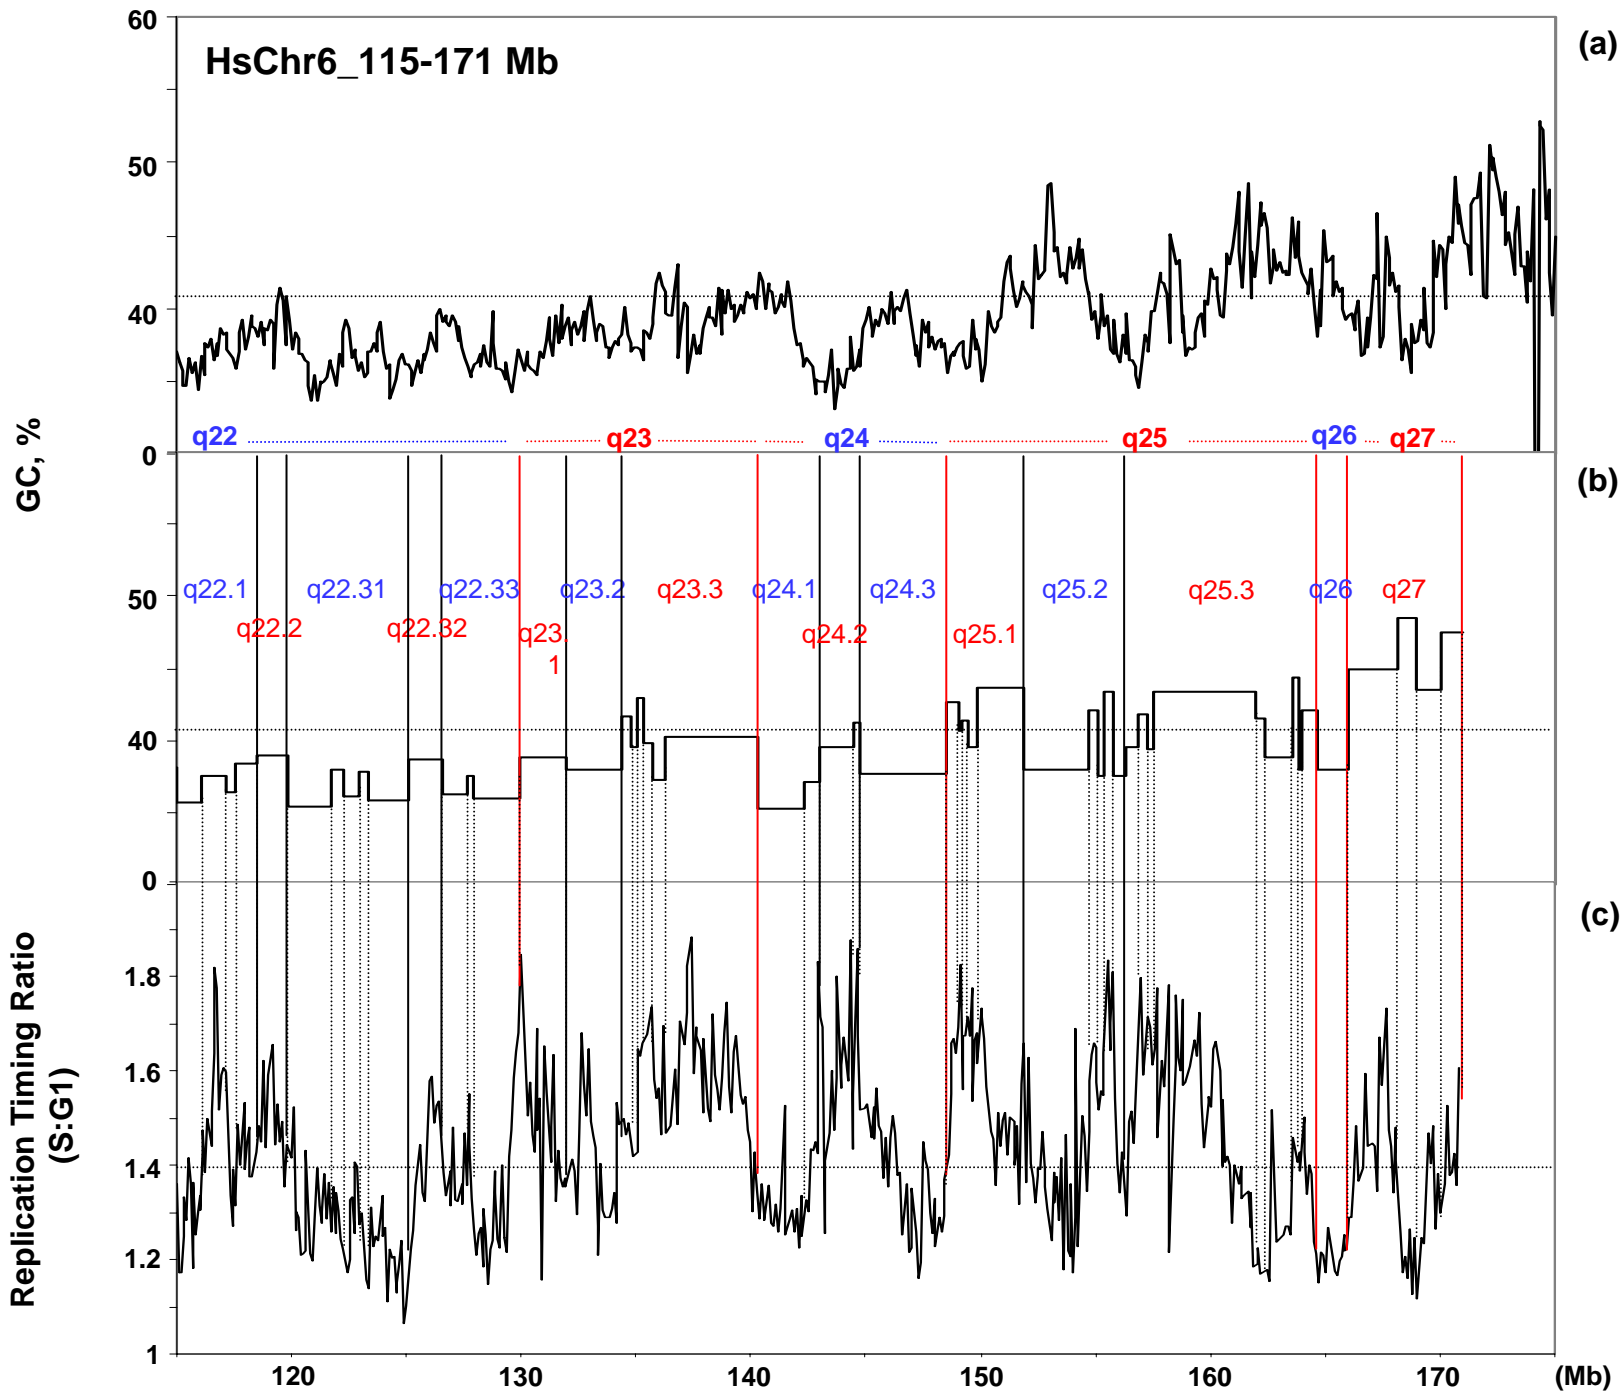

Supplement: pnas_0710587105_2.pdf [file pnas_0710587105_2.pdf]

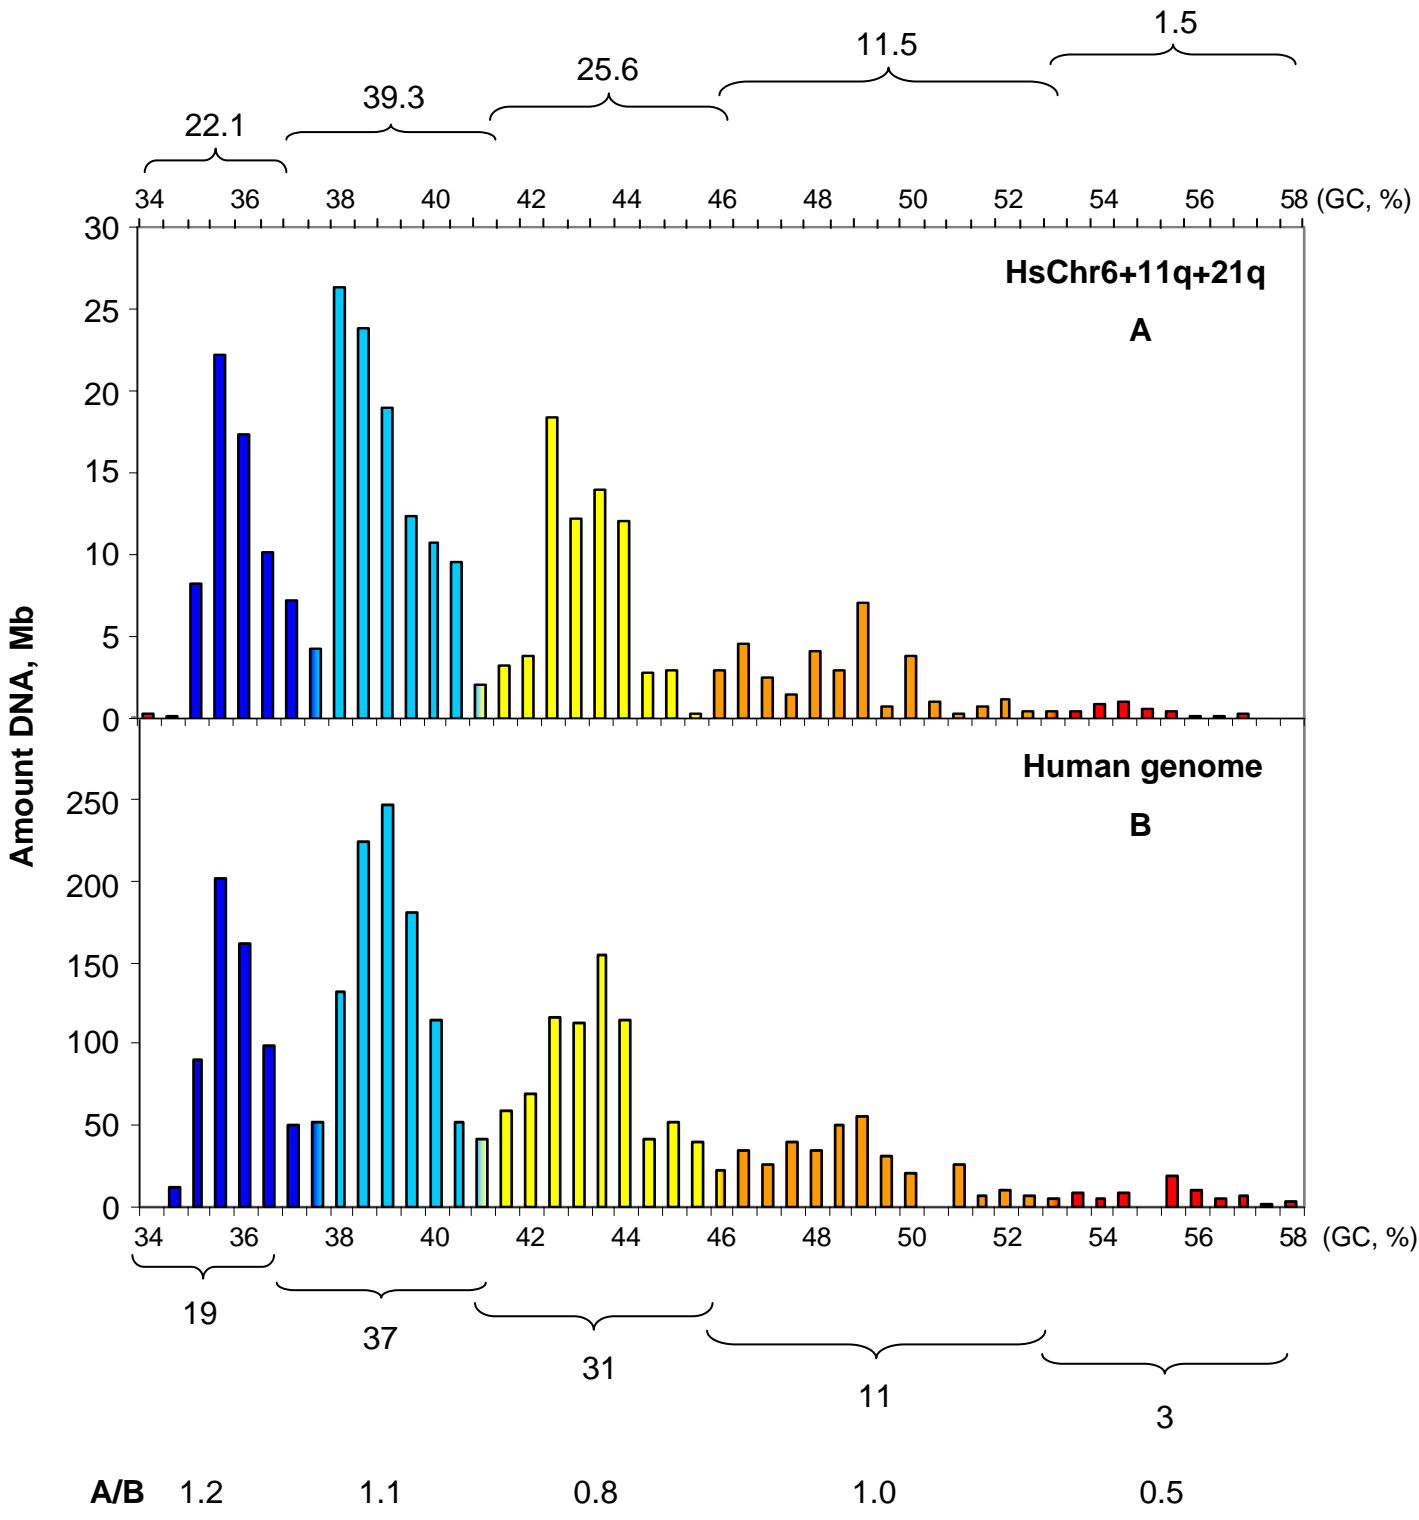

Supplement: pnas_0710587105_3.pdf [file pnas_0710587105_3.pdf]
